# Supplementary material for: Electrokinetic generation of iron-rich barriers in soils: realising the potential for nuclear site management and decommissioning
Source: Royal Society of Chemistry journal article supplement (doi:10.1039/d2va00308b), 2023-01-01
Supplement: d2va00308b1.pdf [file d2va00308b1.pdf]

## Electrokinetic generation of iron-rich barriers in soils: realising the potential for nuclear site management and decommissioning.

Jamie M. Purkis<sup>a</sup>, Frances Burrell<sup>a</sup>, James R. Brydie<sup>b</sup>, James Graham<sup>c</sup>, Laurence Hopkinson<sup>d</sup>, and Andrew B. Cundy<sup>a\*</sup>

<sup>a</sup> School of Ocean and Earth Science, University of Southampton, National Oceanography Centre (Southampton), European Way, Southampton, SO14 3ZH, UK

<sup>b</sup> CanmetENERGY, Natural Resources Canada, Devon, Alberta, T9G 1A8, Canada

<sup>c</sup> National Nuclear Laboratory, Central Laboratory, Sellafield, Seascale, Cumbria, CA20 1PG, UK

<sup>d</sup> School of Applied Sciences, University of Brighton, Lewes Road, Brighton, BN2 4GJ, UK

Corresponding author: [A.Cundy@soton.ac.uk](mailto:A.Cundy@soton.ac.uk)

### SUPPORTING INFORMATION

#### S11: Supporting information for Figure 6: Pilot scale experiment, conducted to inform set-up of the large-scale experiment detailed in Figures 3, 4, and 5 of main paper.

Plate electrodes (LWH 0.2 x 28 x 18 cm; anode, mild steel, cathode, stainless steel) were placed in silica sand (14 kg) with 1 mM NaNO<sub>3</sub> electrolyte saturated to 50%, with a 50 V electric field (1 V.cm<sup>-1</sup>) applied, in a 50 x 30 x 20 cm (length x width x height (LWH); 30,000 cm<sup>3</sup>) container. The electrodes were slightly smaller than the width and depth of the container, 28 cm wide by 18 cm high (504 cm<sup>2</sup>). Initial current was 110 mA, treatment time was 47 days.

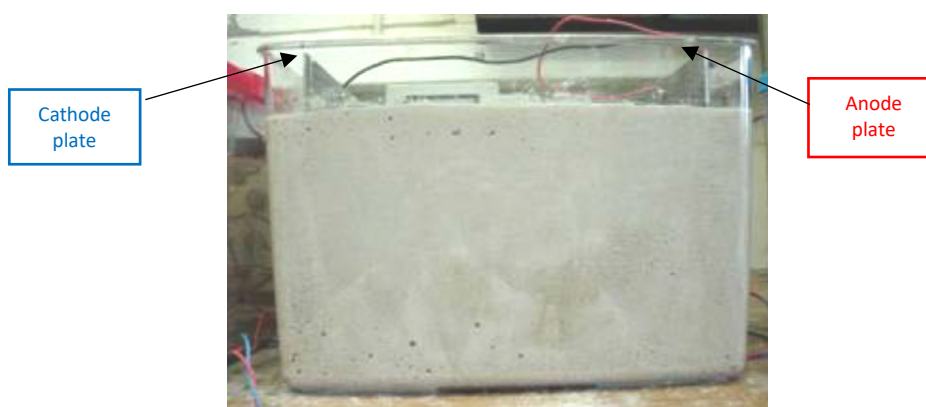

Figure S1 – Experimental set-up for pilot scale (sub-metre) experiment with cathode and anode plates highlighted. Cell dimensions: 50 x 30 x 20 cm LWH.
